# Supplementary material for: Antimicrobial Peptide-Functionalized Mesoporous Hydrogels
Source: PubMed Central journal article supplement (PMC8153390; doi:10.1021/acsbiomaterials.1c00029), 2021-03-15
Supplement: ab1c00029_si_001.pdf [file ab1c00029_si_001.pdf]

## Antimicrobial Peptide Functionalized Mesoporous Hydrogels

Saba Atefyekta<sup>1a</sup>, Edvin Blomstrand<sup>1a</sup>, Anand K. Rajasekharan<sup>1</sup>, Sara Svensson<sup>2</sup>, Margarita Trobos<sup>2,5</sup>, Jaan Hong<sup>3</sup>, Thomas J. Webster<sup>4</sup>, Peter Thomsen<sup>2</sup> and Martin Andersson<sup>1</sup>

Corresponding author Email: [martin.andersson@chalmers.se](mailto:martin.andersson@chalmers.se)

a) has contributed equally to this work.

In order to ensure that the AMPs are covalently attached to the hydrogels and do not leak out during long-term washing, fluorescent-tagged AMPs (5(6) carboxyfluorescein-AMP) was covalently bonded and physically adsorbed onto hydrogels and washed for 3 weeks (Figure S1). It was shown that AMPs that were covalently bonded onto hydrogels did not leak out upon washing with milli-Q water for up to three weeks while the physically absorbed AMPs lost the whole AMP content by the end of the experiment.

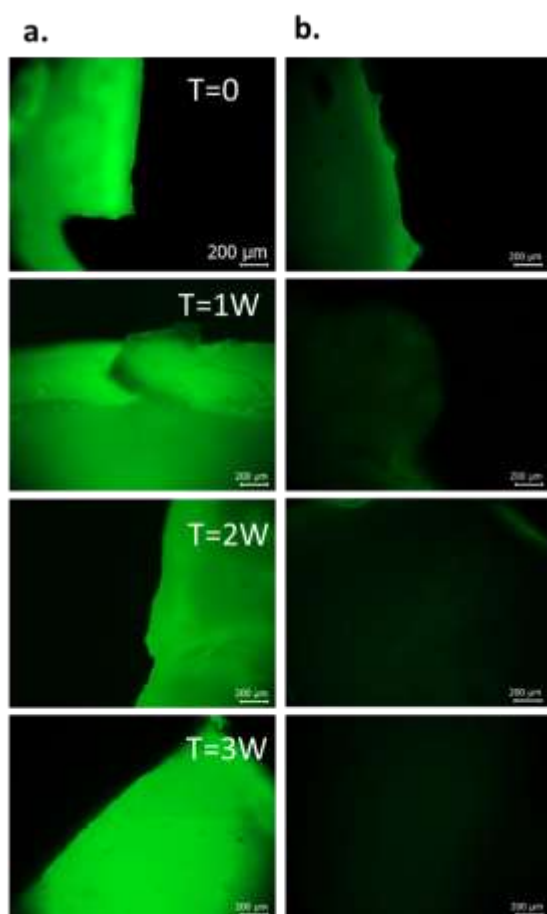

Figure S1. 5(6) carboxyfluorescein-AMP (green fluorescence): (a) covalently bonded using EDC-NHS coupling and (b) physically adsorbed onto hydrogels (by submerging the hydrogels into AMP solution), washed in milli-Q water up to 3 weeks. The milli-Q water was changed twice per day and the surfaces were put back into the milli-Q water after imaging with a fluorescent microscope. The microscope used was a Zeiss Axio Imager Z2m.
